# Supplementary material for: Cortical and Subthalamic Nucleus Spectral Changes During Limb Movements in Parkinson's Disease Patients with and Without Dystonia
Source: PubMed Central journal article supplement (PMC9541849; doi:10.1002/mds.29057), 2022-06-14
Supplement: MDS-37-1683-s001.pdf [file MDS-37-1683-s001.pdf]

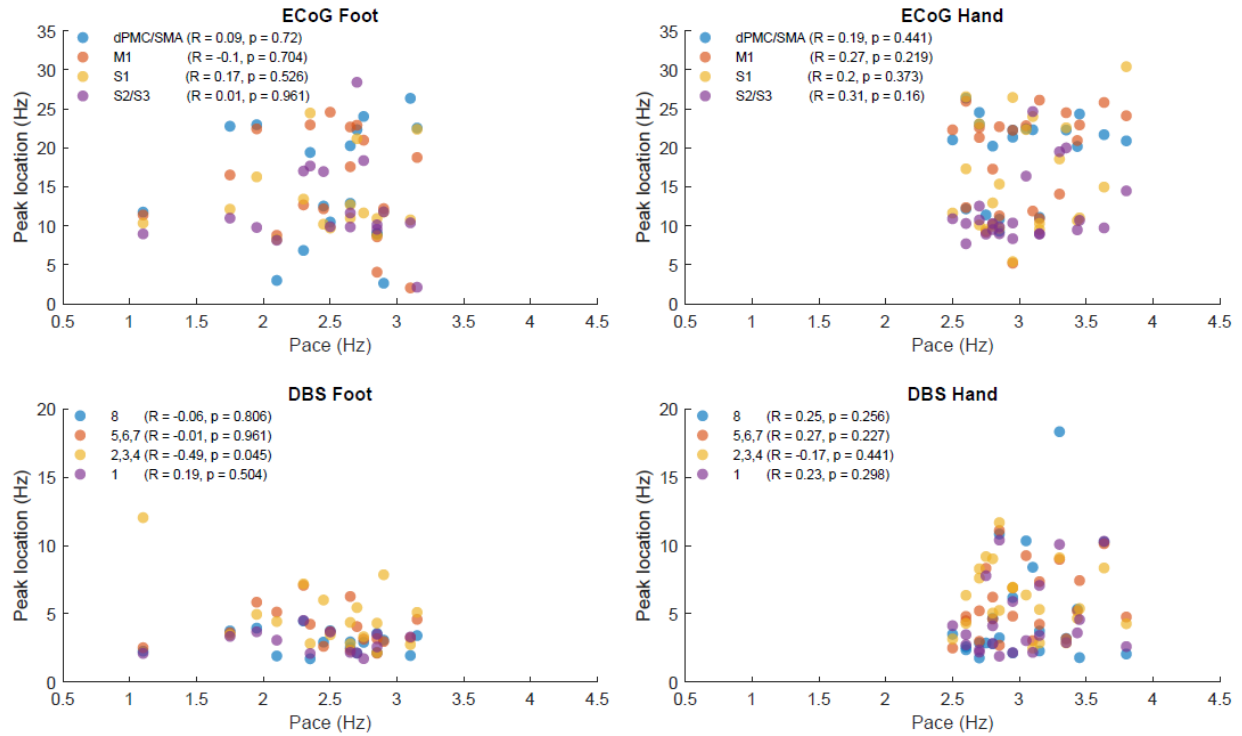

**SUPPLEMENTARY FIGURE 1. Correlation between the movement pace and spectral extrema.** Above are frequencies of maximum cortical desynchronization during movement compared to rest (FIGURE 3). For each cortical region, Pearson correlation is given with p-values not adjusted for multiple comparisons. Below are frequencies of maximum subcortical synchronization during movement compared to rest.
