# Supplementary material for: Cortical and Subthalamic Nucleus Spectral Changes During Limb Movements in Parkinson's Disease Patients with and Without Dystonia
Source: PubMed Central journal article supplement (PMC9541849; doi:10.1002/mds.29057), 2022-06-14
Supplement: MDS-37-1683-s002.pdf [file MDS-37-1683-s002.pdf]

| <b>General description of dystonia</b>                                   | <b>Activities that worsen dystonia</b>                                                            | <b>Body part affected by dystonia</b>                                     |
|--------------------------------------------------------------------------|---------------------------------------------------------------------------------------------------|---------------------------------------------------------------------------|
| 'All the time when meds wear off.'                                       | 'No specific activities.'                                                                         | 'Both feet. Toes curl.'                                                   |
| 'Unclear to participant. It seems random.'                               | 'Standing, walking, resting.'                                                                     | 'Left, middle, fingers, and toes on right foot. Right fingers will draw.' |
| 'Leg morning and evening (morning before medicines work).'               | 'Ocular is brought on by bright lights. Leg activity is brought on if he thinks about it'         | 'Leg and eye'                                                             |
| 'Every 4 hours when meds wear off'                                       | 'She experiences it at rest.'                                                                     | 'Right toes. Right leg. Both wrists. Her neck.'                           |
| 'Shortly after dose of medicine until it starts wearing off.'            | 'Sitting, at rest'                                                                                | 'Left foot'                                                               |
| 'Only notice it when sitting on couch watching TV at the end of the day' | 'Only notice it when resting'                                                                     | 'Left and right feet areas affected'                                      |
| 'When tired'                                                             | 'Walking will bring it on'                                                                        | 'Left foot'                                                               |
| 'Does not happen at specific time of day'                                | 'Sitting and rest'                                                                                | 'Both legs'                                                               |
| '1st thing in the morning when meds are off.'                            | 'At rest, also hands will activate if reading or holding something; Foot at rest, with meds off.' | 'Both feet, both hands/wrists and neck.'                                  |
| 'Afternoon'                                                              | 'At rest'                                                                                         | 'Neck'                                                                    |
| 'When medicines are off'                                                 | 'Anything that requires continuous effort/force'                                                  | 'Right side hand and toes'                                                |
| 'When medicines wear off'                                                | 'Rest'                                                                                            | 'Neck, trunk, right arm and right foot'                                   |
| 'All the time.'                                                          | 'Always.'                                                                                         | 'Left toes and neck.'                                                     |
| 'Starts after participant takes the first dosage of medicine'            | 'At rest'                                                                                         | 'Left leg'                                                                |
| 'Night, afternoon'                                                       | 'Lack of sleep, lack of exercise.'                                                                | 'Right shoulder, hip, foot'                                               |
| 'Occurs often'                                                           | 'Walking, anxiety'                                                                                | 'Right foot'                                                              |
| 'Does not occur often'                                                   | 'Rest'                                                                                            | 'Left arm'                                                                |

SUPPLEMENTARY TABLE 1. Patient experiences with dystonia surveyed pre-surgery.
